# Supplementary material for: Fractal circuit sensors enable rapid quantification of biomarkers for donor lung assessment for transplantation
Source: PubMed Central journal article supplement — Sci Adv. 2015 Aug 28;1(7):e1500417. doi: 10.1126/sciadv.1500417 (PMC4643795; doi:10.1126/sciadv.1500417), 2015-08-28
Supplement: 1500417_SM.pdf [file 1500417_SM.pdf]

## Supplementary Materials for

### **Fractal circuit sensors enable rapid quantification of biomarkers for donor lung assessment for transplantation**

Andrew T. Sage, Justin D. Besant, Laili Mahmoudian, Mahla Poudineh, Xiaohui Bai, Ricardo Zamel, Michael Hsin, Edward H. Sargent, Marcelo Cypel, Mingyao Liu, Shaf Keshavjee, Shana O. Kelley

Published 28 August 2015, *Sci. Adv.* **1**, e1500417 (2015)  
DOI: 10.1126/sciadv.1500417

#### **This PDF file includes:**

- Fig. S1. Validation of LTx probes and FraCS approach with DNA targets.
- Fig. S2. GAPDH validation with RNA.
- Fig. S3. qPCR validation.
- Fig. S4. Bland-Altman analysis of FraCS versus qPCR.
- Table S1. Bland-Altman results of FraCS versus qPCR.

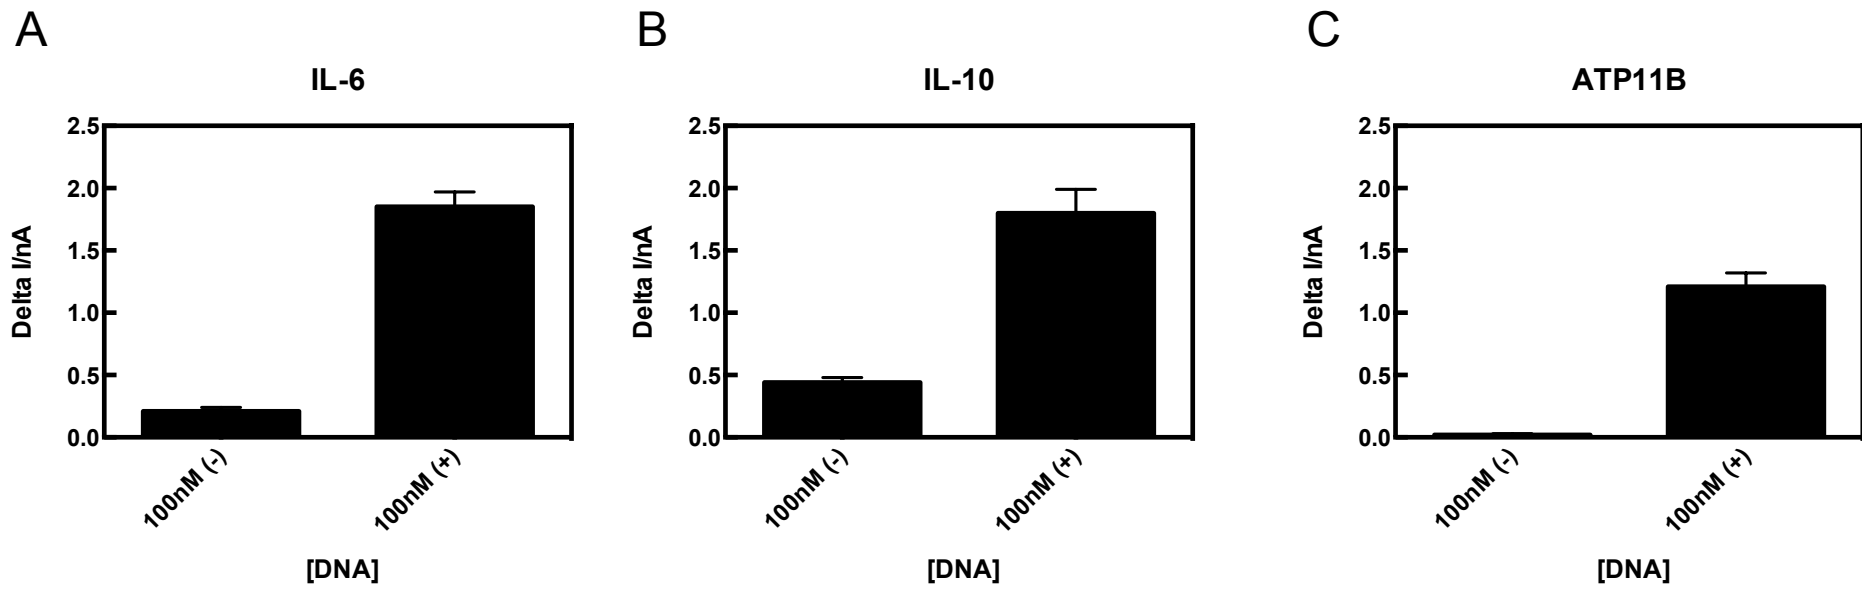

**Figure S1. Validation of LTx Probes and FraCS approach with DNA targets.** Hybridization signals for FraCS challenged with 100nM complementary (+) or non-complementary (-) DNA for (A) IL-6, (B) IL-10, and (C) ATP11B sensors. Data represented are of n=15 different sensors. Columns represent mean and error-bars indicate s.e.m.

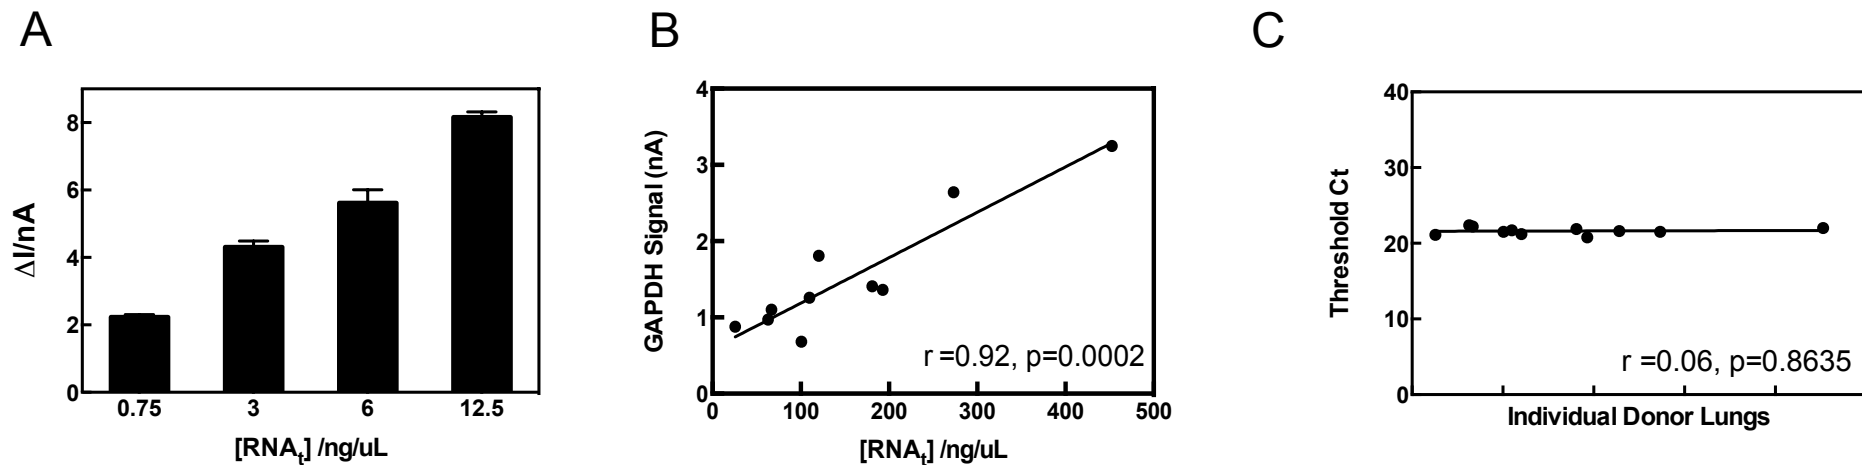

**Figure S2. GAPDH Validation with RNA.** (A) Total RNA titration profile for GAPDH sensors. Data represented are of  $n=15$  different sensors. Columns represent mean and error-bars indicate s.e.m. (B) Correlation of GAPDH signals obtained from FraCS versus total RNA concentration (Data were analyzed by two-tailed, Pearson correlation) ( $n=10$  different donor lungs). (C) Correlation of GAPDH signals obtained from qPCR expression levels (Threshold Ct) for  $n=11$  different donor lungs (Data were analyzed by two-tailed, Pearson correlation).

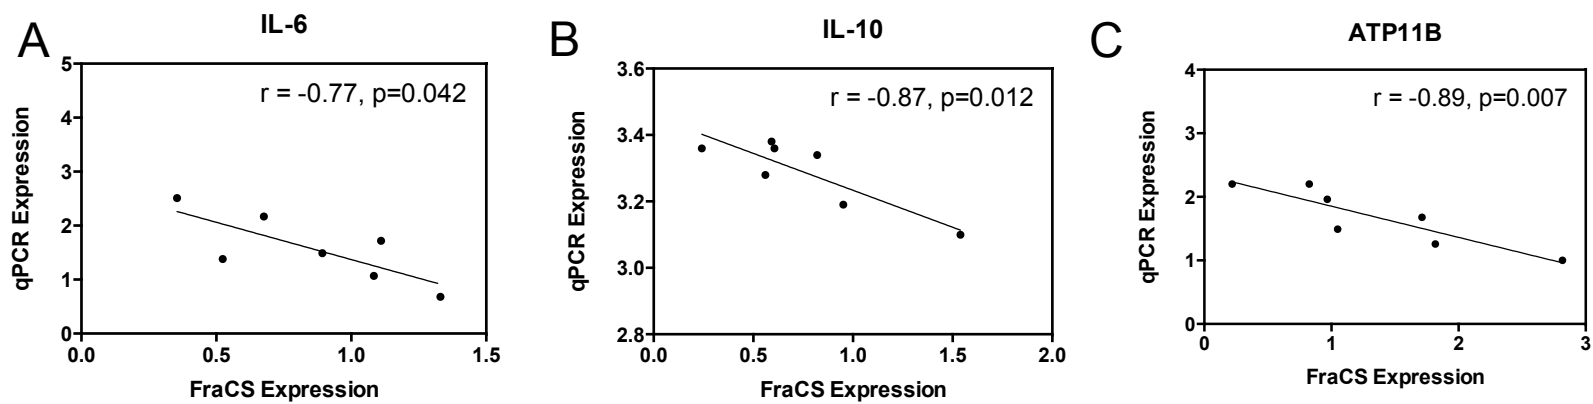

**Figure S3. qPCR Validation.** Correlation of signals obtained from qPCR versus FraCS in individual donor lungs (n=7) for (A) IL-6, (B) IL-10, and (C) ATP11B sensors. Data were analyzed by two-tailed, Pearson correlation.

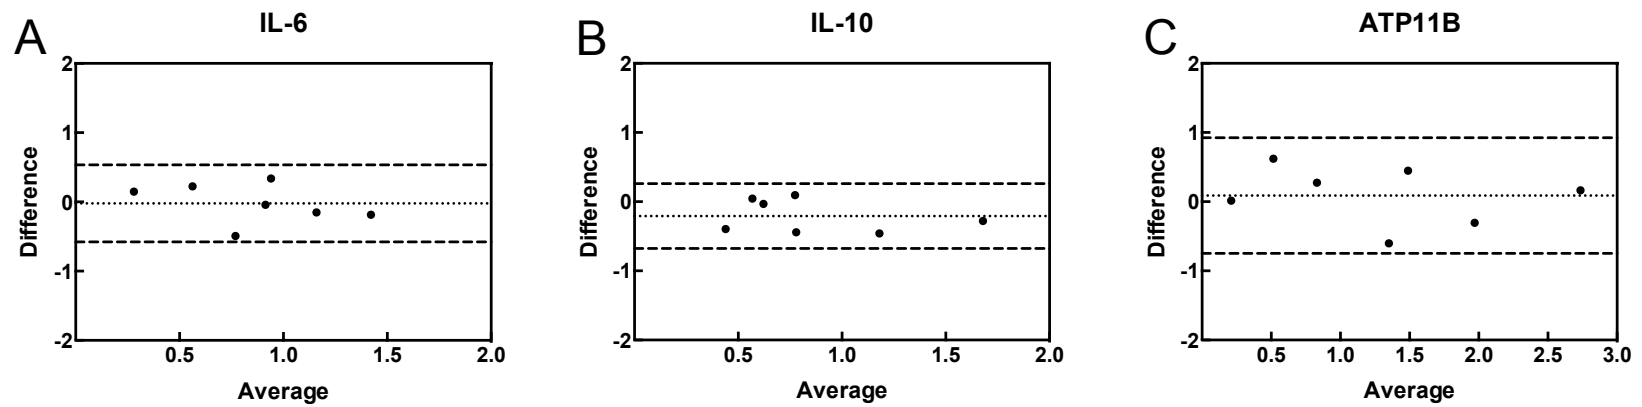

**Figure S4. Bland-Altman Analysis of FraCS vs. qPCR.** Bland-Altman comparison (difference versus average) of signals obtained from individual donor lungs (n=7) run on both the FraCS and qPCR platforms for (A) IL-6, (B) IL-10, and (C) ATP11B.

**Table S1. Bland-Altman Results of FraCS vs. qPCR.**

| Biomarker | Mean Difference | Mean Difference Significantly Different From 0 ? | 95% Limits of Agreement | Slope Significant ? |
|-----------|-----------------|--------------------------------------------------|-------------------------|---------------------|
| IL-6      | -0.02           | No (p=0.84)                                      | -0.58 to 0.53           | No (p=0.42)         |
| IL-10     | -0.21           | No (p=0.06)                                      | -0.68 to 0.26           | No (p=0.52)         |
| ATP11B    | 0.088           | No (p=0.61)                                      | -0.75 to 0.92           | No (p=0.60)         |
